# Supplementary material for: Fabrication of liquid–liquid self-assembled Ag arrays on disposable screen-printed electrodes and their application in the identification and analysis of the adsorption behavior of organic carboxylates through in situ electrochemical surface-enhanced Raman scattering
Source: Royal Society of Chemistry journal article supplement (doi:10.1039/c9nj06000f), 2019-12-17
Supplement: c9nj06000f1.pdf [file c9nj06000f1.pdf]

## Electronic Supplementary Information

### Fabrication of liquid–liquid self-assembled Ag array on disposable screen-printed electrodes and their application in the identification and analysis of adsorption behavior of organic carboxylates through *in-situ* electrochemical surface-enhanced Raman scattering

Yuanjie Teng<sup>\*a</sup>, Zeyu Ren<sup>a</sup>, Yuchao Zhang<sup>a</sup>, Zhenni Wang<sup>a</sup>, Zaifa Pan<sup>b</sup>,  
Kang Shao<sup>b</sup>, Yuanbin She<sup>\*b</sup>

<sup>a</sup>State Key Laboratory Breeding Base of Green Chemistry-Synthesis Technology, College of Chemical Engineering, Zhejiang University of Technology, Hangzhou 310032, China

<sup>b</sup>College of Chemical Engineering, Zhejiang University of Technology, Hangzhou 310032, China

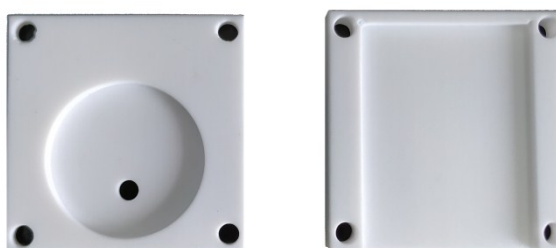

**Fig.S1** The specially designed electrochemical cell used in this EC-SERS platform

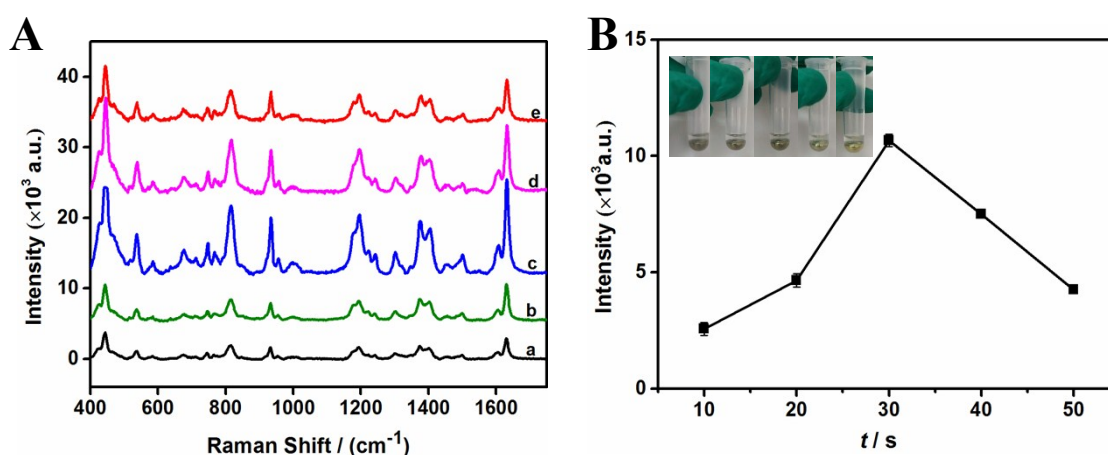

**Fig. S2** SERS spectra (a-e) of 10<sup>-6</sup> mol/L MG solution (A) and corresponding SERS intensity (B) and digital photograph (the inset) on liquid–liquid self-assembled Ag nanoarrays prepared by 10, 20, 30, 40, 50 s vortex mixing time, respectively.

### Calculation of Enhancement Factor (EF).

SERS spectra of 2.5  $\mu\text{L}$  of  $10^{-2}$  mol/L MG and  $10^{-6}$  mol/L MG solution on bare SPE and Ag nanoarrays were recorded and the intensity at the peak of  $436\text{ cm}^{-1}$  was selected to calculate the EF. The EF for the Ag nanoarray@SPE was estimated according to the following equation:

$$\text{EF} = \left( \frac{I_{\text{SERS}}}{I_{\text{norm}}} \right) \left( \frac{C_{\text{norm}}}{C_{\text{SERS}}} \right)$$

Where  $I_{\text{SERS}}$  is the SERS intensity of the MG adsorbed on the Ag nanoarray@SPE;  $I_{\text{norm}}$  is the normal Raman intensity of the MG on the bare SPE;  $C_{\text{SERS}}$  is the concentration of the MG irradiated by laser on the Ag nanoarray@SPE;  $C_{\text{norm}}$  is the concentration of the effective MG irradiated by a laser on the bare SPE. For the SERS peak at  $436\text{ cm}^{-1}$ , the ratio of  $I_{\text{SERS}}$  to  $I_{\text{norm}}$  was calculated as 20, so EF was about  $2 \times 10^5$ .

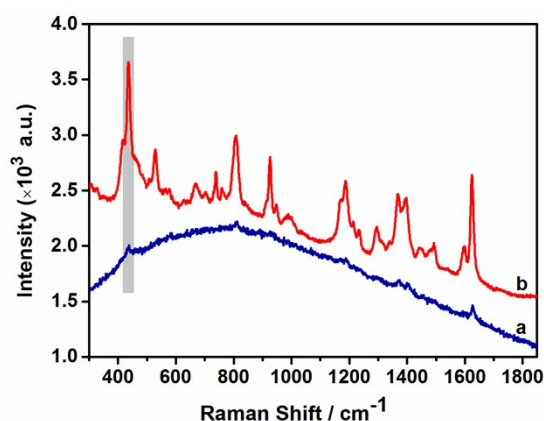

**Fig. S3** Normal Raman spectrum of  $10^{-2}$  mol/L MG solution on bare SPE (a) and SERS spectrum of  $10^{-6}$  mol/L MG solution on Ag nanoarray@SPE (b).

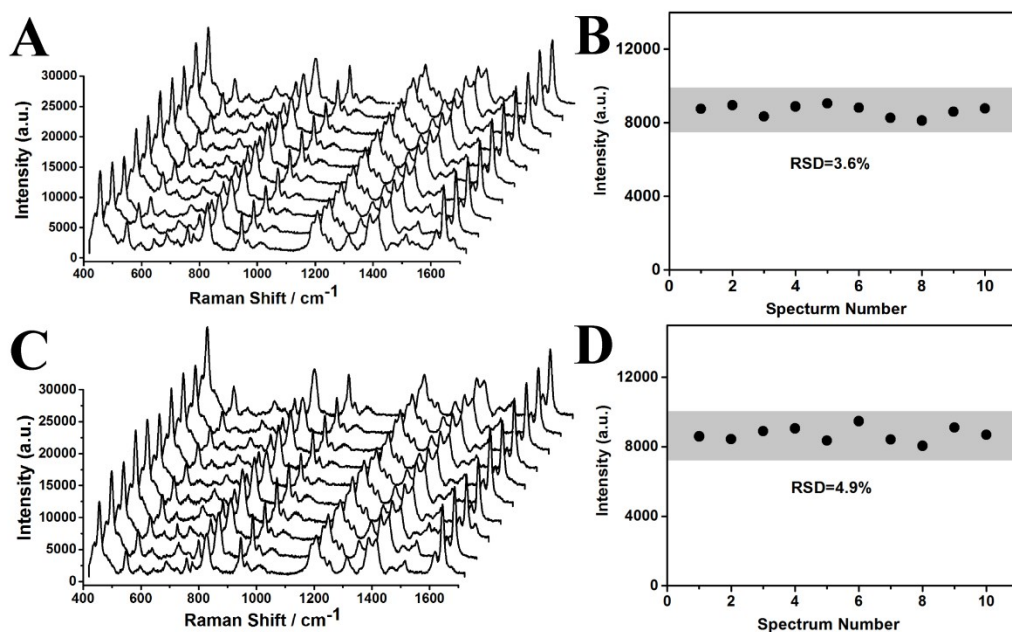

**Fig. S4** (A) SERS spectra of  $10^{-6}$  mol/L MG solution collected from 10 randomly selected points on the same Ag nanoarray@SPE. (B) SERS intensity distribution at  $1624\text{ cm}^{-1}$ . (C) SERS spectra of  $10^{-6}$  mol/L MG solution collected from 10 randomly selected Ag nanoarray@SPEs. (D) Corresponding SERS intensity distribution at  $1624\text{ cm}^{-1}$ .

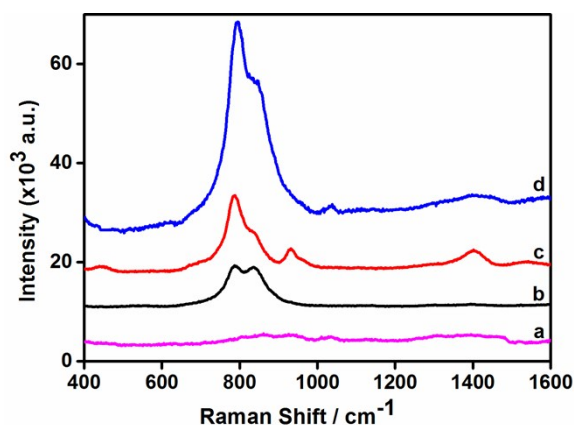

**Fig. S5** SERS spectra of background of Ag array@SPEs (a), tartrate (b), malate (c) and citrate (d) at the voltage of 0.100 V.

**Table S1** Comparison the developed method for the qualitative analysis of citrate, tartrate and malate with the reported literature

| Technology | Analyte                   | Substrate    | Adsorption behavior                                                 | reference |
|------------|---------------------------|--------------|---------------------------------------------------------------------|-----------|
| SERS       | citrate                   | Ag Nps       | NG                                                                  | 42        |
| SERS       | tartrate, malate          | Ag Nps       | tartrate adsorbed vertically and malate parallelly                  | 43        |
| EC-SERS    | citrate, tartrate, malate | Ag array@SPE | citrate adsorbed in claw, tartrate parallelly and malate vertically | This work |

Note: NG: not given in the literature

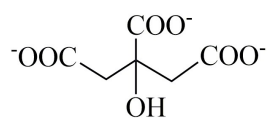

Citrate

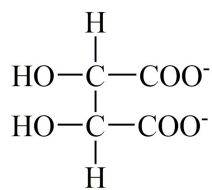

Tartrate

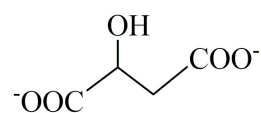

Malate

**Fig. S6** The chemical structures of citrate, tartrate and malate
